# Supplementary material
Source: PubMed Central journal article supplement (PMC7191096)
Supplement: ajcr0010-1255-f7.pdf [file ajcr0010-1255-f7.pdf]

# Interferon regulatory factor-1 reverses chemotherapy resistance

**Table S1.** List of the siRNA sequences

| Name                       | Primer sequence              |
|----------------------------|------------------------------|
| Si-IRF-1 sense             | 5'-CAGAUUCGAGGAGGUGAATT-3'   |
| Si-IRF-1 antisense         | 5'-UUCACCUCCUCGAUAUC UGTT-3' |
| Negative control sense     | 5'-UUCUCCGAACGUGUCACGUTT-3'  |
| Negative control antisense | 5'-ACGUGACACGUUCGGAGAATT-3'  |

**Table S2.** List of the primer sequences

| Primer name | Primer sequence        |
|-------------|------------------------|
| H-IRF-1 F   | GCATGGCTGGGACATCAAC    |
| H-IRF-1 R   | TTCCTGCTCTGGTCTTTCACCT |
| H-RAD51 F   | ACTGCTCCCTGGGGTTCTC    |
| H-RAD51 R   | TTCCTAAGGCACCATGTCAAAG |
| H-GAPDH F   | AATCCCATCACCATCTTCCAG  |
| H-GAPDH R   | GAGCCCCAGCCTTCTCCAT    |

**Table S3.** List of the sequences of the primers surrounding the putative binding sites for IRF-1 from RAD51 gene promoter region

| Primer name | Primer sequence         |
|-------------|-------------------------|
| Site-1-F    | AGTACCTAGAGACCAAAGCTCCT |
| Site-1-R    | GAAGTGCTTGAACCCGGGAG    |
| Site-2-F    | TGAGACCACAGGCACAAGCC    |
| Site-2-R    | ATATAAGGCCTGCACGGTGCC   |

# Interferon regulatory factor-1 reverses chemotherapy resistance

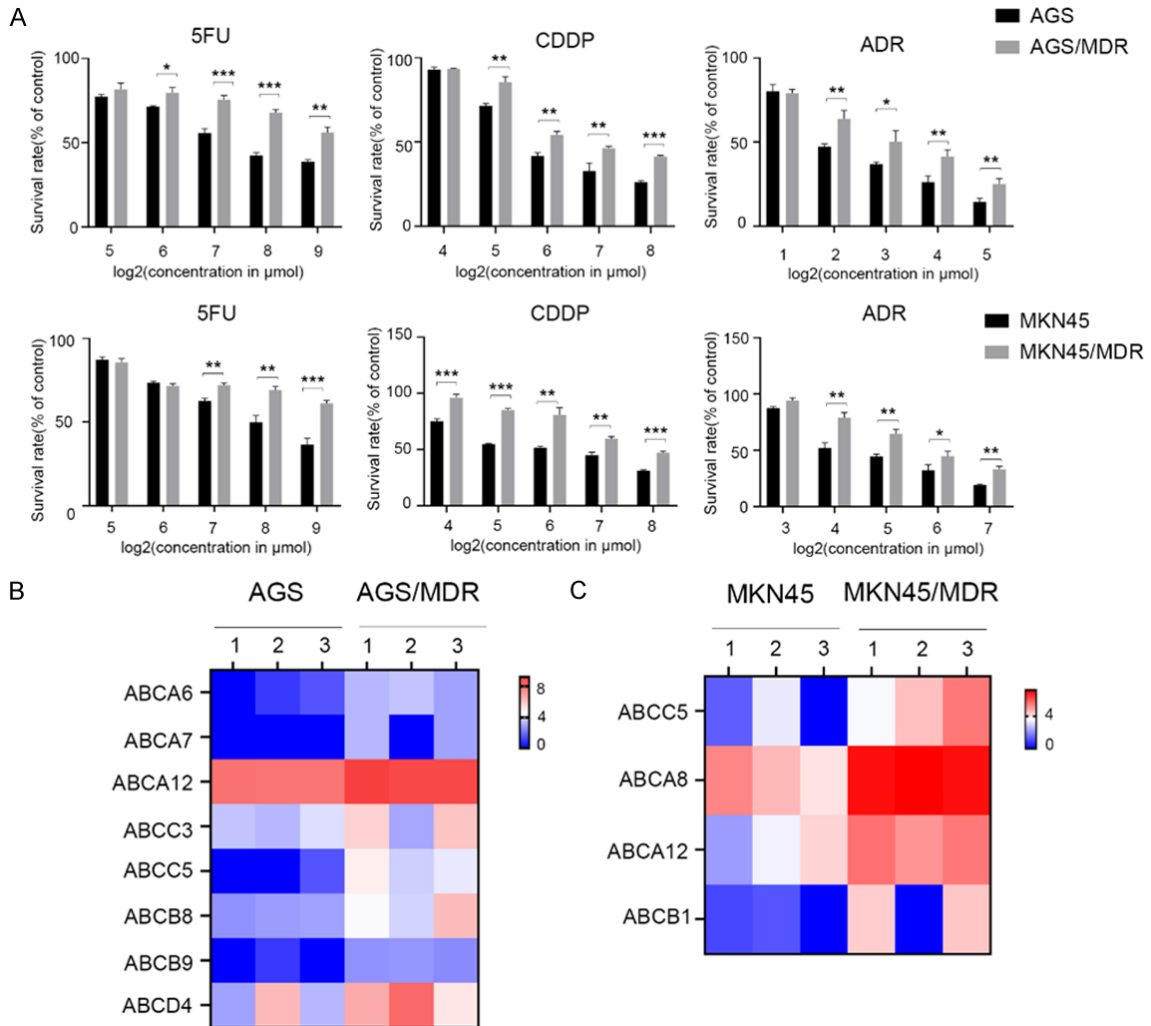

**Figure S1.** MDR GC cell lines. A. Survival rates of the MDR (AGS/MDR and MKN45/MDR) cell lines compared with those of the parental GC cells (AGS and MKN45) after treatment with various concentrations of CDDP, 5FU, and ADR. B. Heatmap of the ABC gene family transcript expression in the AGS cell line with or without MDR. C. Heatmap of the ABC gene family transcript expression in the MKN45 cell line with or without MDR. All experiments were performed in triplicates. The data are represented as the mean  $\pm$  SD. \* $P < 0.05$ , \*\* $P < 0.01$ , and \*\*\* $P < 0.001$ .

## Interferon regulatory factor-1 reverses chemotherapy resistance

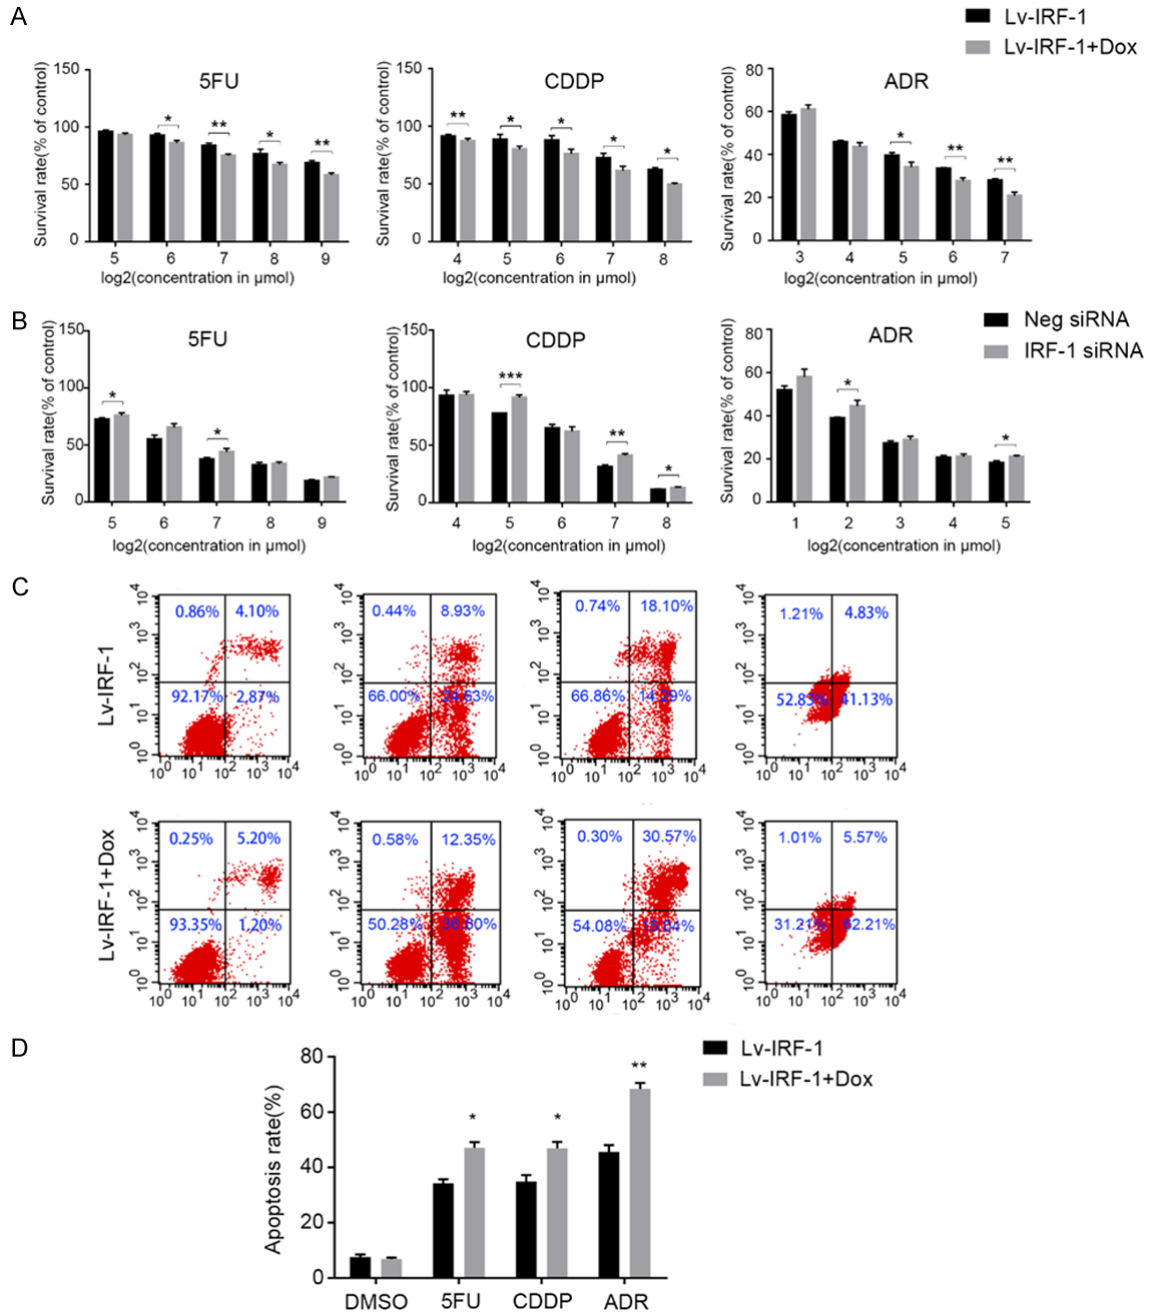

**Figure S2.** IRF-1 reverses the chemoresistance of gastric cancer *in vitro*. A. Cell viability assay of the cell survival rates of MKN45 MDR/Lv-IRF-1 cells in the presence or absence of 2 µg/ml Dox 24 h after treatment with various concentrations of 5FU, CDDP, and ADR. B. Cell viability assay of the cell survival rates of AGS cells transfected with negative control (Neg) siRNA or IRF-1 siRNA after treatment with various concentrations of 5FU, CDDP, and ADR. C. Flow cytometry detection of apoptotic cells after treatment of MKN45 MDR/Lv-Null and MKN45 MDR/Lv-IRF-1 cells with 2 µg/ml Dox and 800 µmol/l 5FU and 200 µmol/l CDDP and 30 µmol/l ADR for 24 h. DMSO was used as the control treatment. D. The apoptosis rates of MKN45 MDR/Lv-Null and MKN45 MDR/Lv-IRF-1 cells after treatment with 2 µg/ml Dox and 500 µmol/l 5FU and 100 µmol/l CDDP and 5 µmol/l ADR for 24 h. All experiments were performed in triplicates. The data are represented as the mean ± SD. \*P < 0.05, \*\*P < 0.01, and \*\*\*P < 0.001.

Interferon regulatory factor-1 reverses chemotherapy resistance

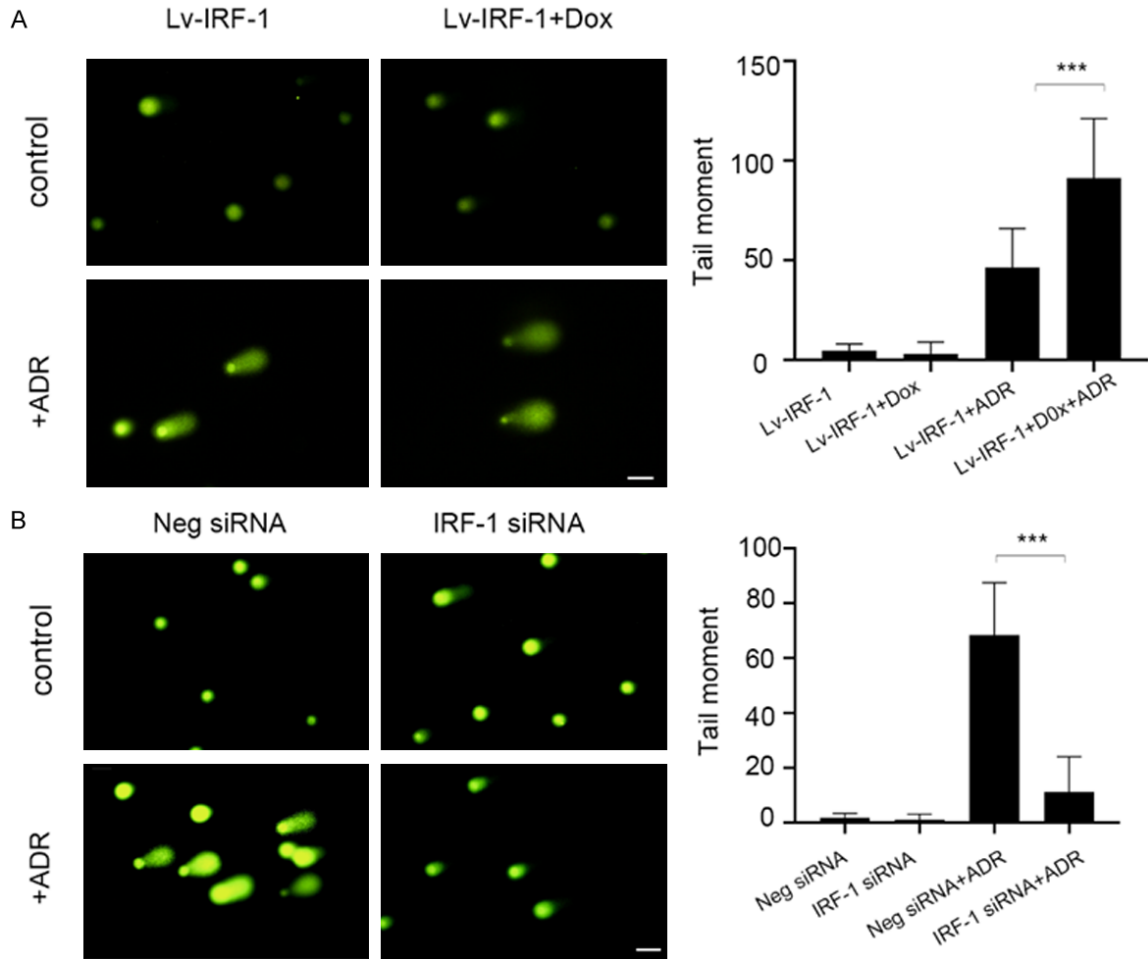

# Interferon regulatory factor-1 reverses chemotherapy resistance

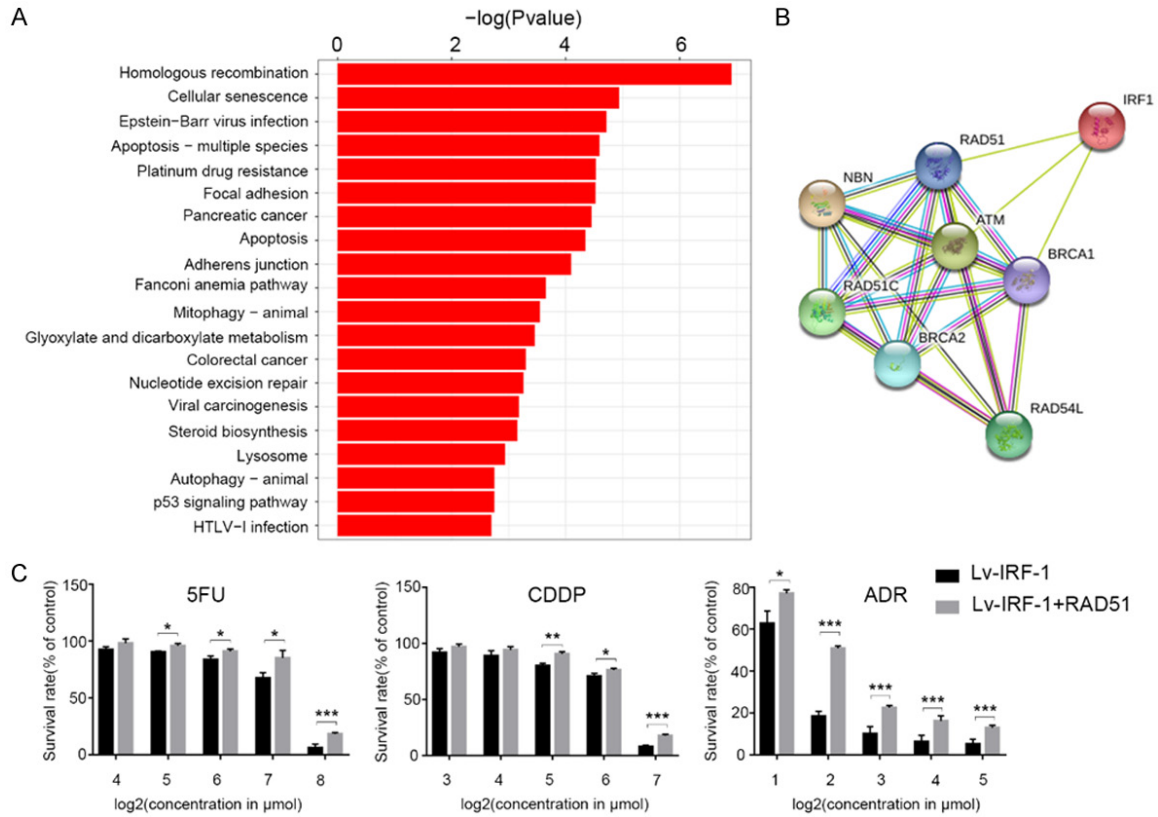

**Figure S4.** (A) Functional enrichment analysis of the IRF-1 transcripts in cell lines with AGS MDR versus AGS parental gastric cancer cell lines. The ordinate represents the name of the significantly enriched KEGG pathway, and the abscissa represents  $-\text{Log}_{10}(P\text{-value})$ . (B) Target gene protein interaction network diagram. (C) Cell viability assay of the cell survival rates of SGC7901 cells expressing Lv-IRF-1 and Lv-IRF-1 plus RAD51. All experiments were performed in triplicates. In (C), the data are represented as the mean  $\pm$  SD. \* $P < 0.05$ , \*\* $P < 0.01$ , and \*\*\* $P < 0.001$ .
